# Supplementary material
Source: publisher site journal article supplement (https://www.spandidos-publications.com/3663/downloadSupplementary)

Figure S1. Transfection efficiencies of IRE1 $\alpha$  and HIF-1 $\alpha$  overexpression vectors. Following transfection with (A) HA-IRE1 $\alpha$  or (B) HA-HIF-1 $\alpha$ , transfection efficiencies were determined via western blotting. IRE1 $\alpha$ , inositol-requiring transmembrane kinase and endonuclease-1 $\alpha$ ; HIF-1 $\alpha$ , hypoxia inducible factor-1 subunit  $\alpha$ ; HA, hemagglutinin.

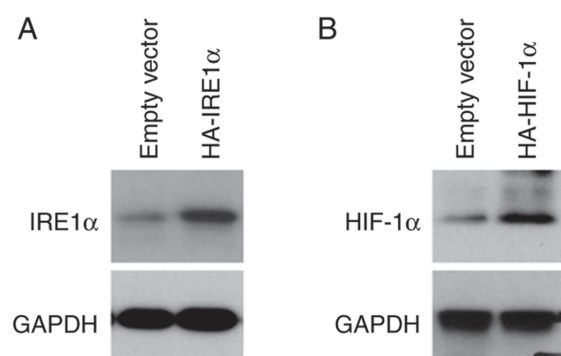

Supplement: Supplementary file 1 [file downloadSupplementary]
